# Supplementary material for: PANDAA intentionally violates conventional qPCR design to enable durable, mismatch-agnostic detection of highly polymorphic pathogens
Source: PubMed Central journal article supplement (PMC7892852; doi:10.1038/s42003-021-01751-9), 2021-02-18
Supplement: 42003_2021_1751_MOESM3_ESM.pdf [file 42003_2021_1751_MOESM3_ESM.pdf]

## **Description of Additional Supplementary Files**

**File name:** Supplementary Data 1

**Description:** Source data for all graphs.
